# Supplementary material for: Spin-crossover complexes in nanoscale devices: main ingredients of the molecule–substrate interactions
Source: Royal Society of Chemistry journal article supplement (doi:10.1039/d1nr04577f), 2021-01-01
Supplement: d1nr04577f1.pdf [file d1nr04577f1.pdf]

## Supporting Information

### **Spin-crossover complexes in nanoscale devices: main ingredients of the molecule-substrate interaction**

Rocío Sánchez-de-Armas,<sup>a</sup> Nicolas Montenegro,<sup>a,b</sup> Aysegul Davelioglu,<sup>c</sup> Enrique Burzurí<sup>c,d\*</sup> and Carmen J. Calzado<sup>a\*</sup>

<sup>a</sup>Departamento de Química Física. U. Sevilla, calle Prof. García González, s/n, 41012 Sevilla. Spain.

<sup>b</sup>Laboratory of Theoretical Chemistry, Faculty of Chemistry and Biology, University of Santiago de Chile (USACH), 9170022, Santiago, Chile

<sup>c</sup>IMDEA Nanociencia, Campus de Cantoblanco, Calle Faraday 9, 28049 Madrid, Spain.

<sup>d</sup>Departamento de Física de la Materia Condensada, Universidad Autónoma de Madrid, 28049 Madrid, Spain.



### geo2 HS

| Atom1 | Atom2 | Length (Å) |
|-------|-------|------------|
| C162  | H23   | 3.330      |
| C188  | H23   | 3.337      |
| C190  | H23   | 3.091      |
| C386  | H10   | 3.159      |
| C410  | H10   | 3.318      |
| C412  | H10   | 3.325      |
| C2    | H10   | 3.247      |
| C51   | H11   | 3.392      |
| C247  | H23   | 3.202      |
| C249  | H23   | 3.117      |
| C303  | H24   | 3.312      |
| C443  | H10   | 3.195      |
| C53   | H11   | 3.264      |
| C55   | H11   | 3.377      |
| C277  | H24   | 3.215      |
| C279  | H24   | 3.175      |
| C445  | H10   | 3.276      |

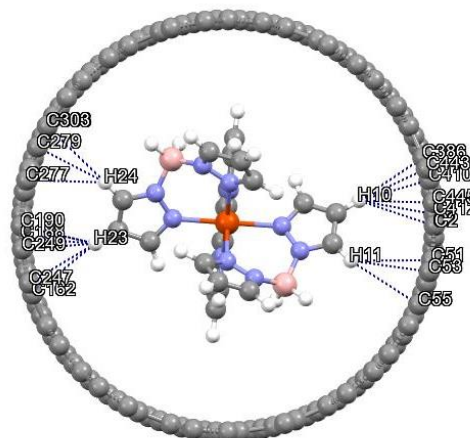

### geo2 LS

| Atom1 | Atom2 | Length (Å) |
|-------|-------|------------|
| C162  | H22   | 3.124      |
| C186  | H22   | 3.348      |
| C386  | H19   | 3.208      |
| C247  | H22   | 3.364      |
| C275  | H23   | 3.249      |
| C443  | H19   | 3.357      |
| C53   | H20   | 3.378      |

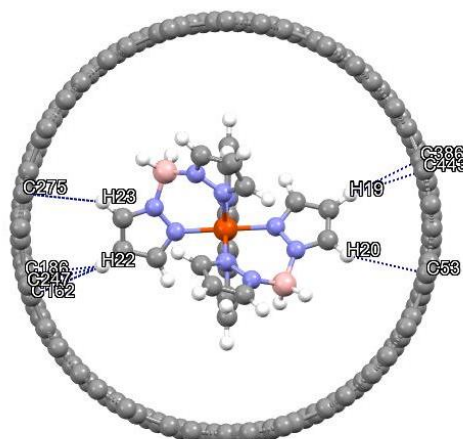



**Figure S1 (cont.) Short contacts for SCO2@SWCNT**

Molecule-nanotube contacts with distances  $\leq 3.4$  Å are reported

**geo1 HS**

| Atom1 | Atom2 | Length (Å) |
|-------|-------|------------|
| C6    | H21   | 3.304      |
| C51   | H23   | 3.179      |
| C53   | H23   | 3.239      |
| C162  | H24   | 3.170      |
| C186  | H24   | 3.202      |
| C188  | H24   | 3.330      |
| C249  | H22   | 3.361      |
| C251  | H22   | 3.275      |
| C300  | H12   | 3.263      |
| C412  | H21   | 3.289      |

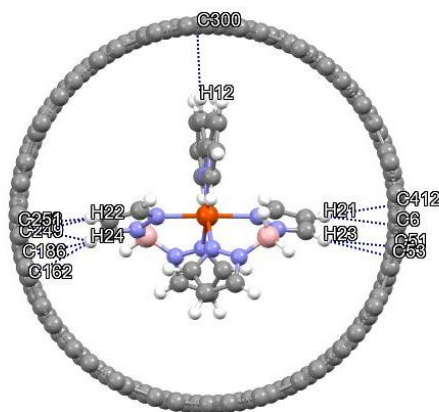

**geo1 LS**

| Atom1 | Atom2 | Length (Å) |
|-------|-------|------------|
| C6    | H22   | 3.482      |
| C216  | H23   | 3.337      |
| C249  | H21   | 3.474      |
| C251  | H21   | 3.478      |
| C275  | H23   | 3.468      |
| C443  | H24   | 3.362      |
| C445  | H24   | 3.359      |

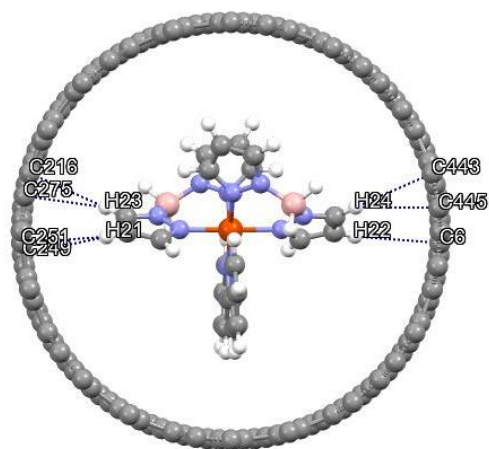

### geo2 HS

| Atom1 | Atom2 | Length (Å) |
|-------|-------|------------|
| C10   | H21   | 3.219      |
| C51   | H21   | 3.038      |
| C53   | H21   | 3.284      |
| C216  | H22   | 3.079      |
| C218  | H22   | 3.182      |
| C249  | H24   | 3.273      |
| C275  | H22   | 3.050      |
| C443  | H23   | 3.182      |

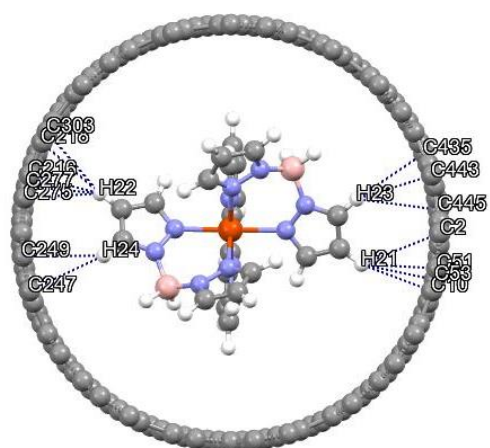

### geo2 LS

| Atom1 | Atom2 | Length (Å) |
|-------|-------|------------|
| C51   | H24   | 3.326      |
| C162  | H21   | 3.166      |
| C247  | H21   | 3.160      |
| C277  | H23   | 3.398      |
| C386  | H22   | 3.208      |
| C410  | H22   | 3.373      |

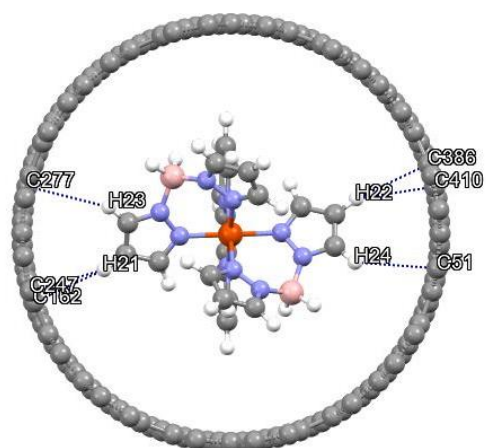

### geo3 HS

| Atom1 | Atom2 | Length (Å) |
|-------|-------|------------|
| C50   | H18   | 3.115      |
| C247  | H17   | 3.173      |
| C274  | H9    | 2.983      |
| C298  | H9    | 2.709      |
| C300  | H9    | 2.566      |
| C302  | H9    | 2.786      |
| C324  | H9    | 3.123      |
| C384  | H10   | 2.921      |
| C386  | H10   | 2.898      |
| C431  | H10   | 2.736      |
| C433  | H10   | 2.702      |
| C435  | H10   | 2.748      |
| C443  | H10   | 2.756      |

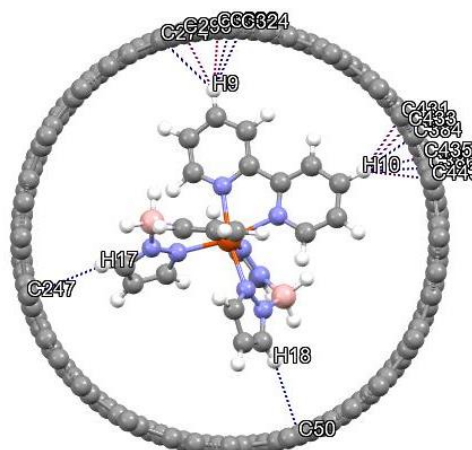

### geo3 LS

| Atom1 | Atom2 | Length (Å) |
|-------|-------|------------|
| C12   | H7    | 3.340      |
| C26   | H9    | 2.894      |
| C28   | H9    | 2.714      |
| C44   | H9    | 3.268      |
| C46   | H9    | 3.291      |
| C48   | H9    | 3.015      |
| C81   | H9    | 3.294      |
| C104  | H10   | 3.397      |
| C106  | H10   | 2.828      |
| C107  | H9    | 2.813      |
| C130  | H10   | 2.785      |
| C132  | H10   | 2.861      |
| C134  | H10   | 3.043      |
| C160  | H8    | 3.318      |
| C191  | H10   | 3.127      |
| C193  | H10   | 3.259      |
| C272  | H16   | 3.285      |
| C331  | H16   | 3.321      |
| C356  | H17   | 3.358      |

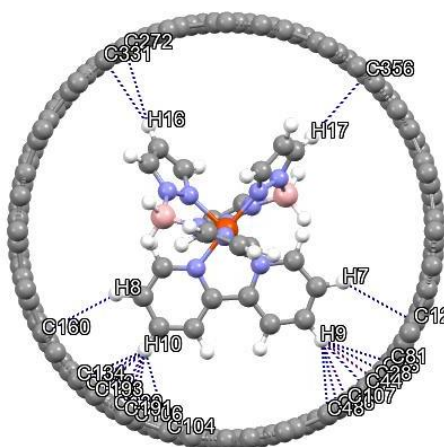

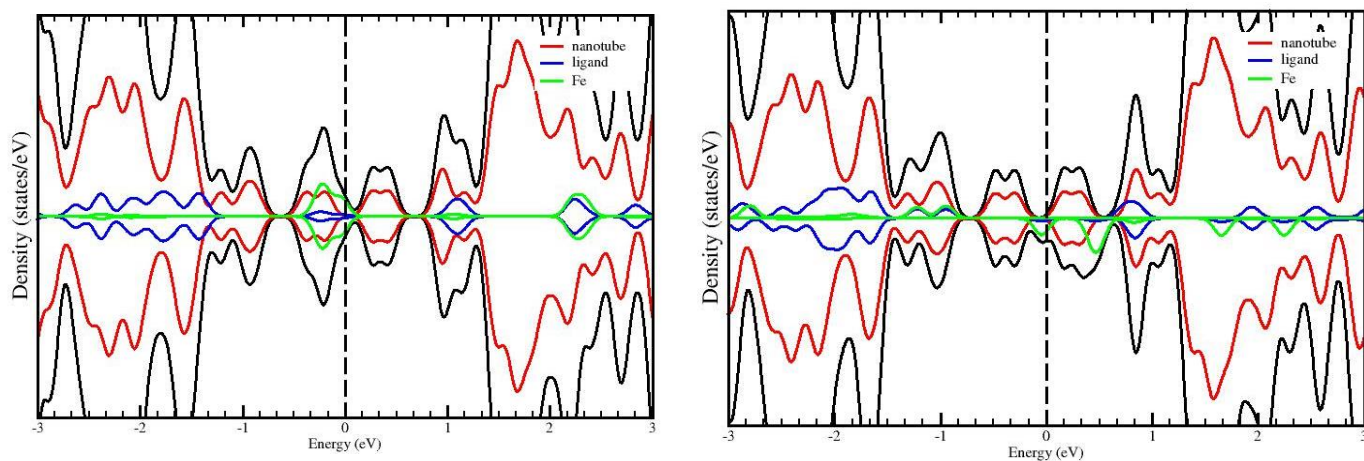

**Figure S2.** Density of states and projected density of states on Fe, ligands and nanotube for SCO1@SWCNT system (left) LS state, (right) HS state. Black lines correspond to the total density of states, while red, blue and green lines correspond to the density of states projected on the nanotube, ligands and Fe, respectively.



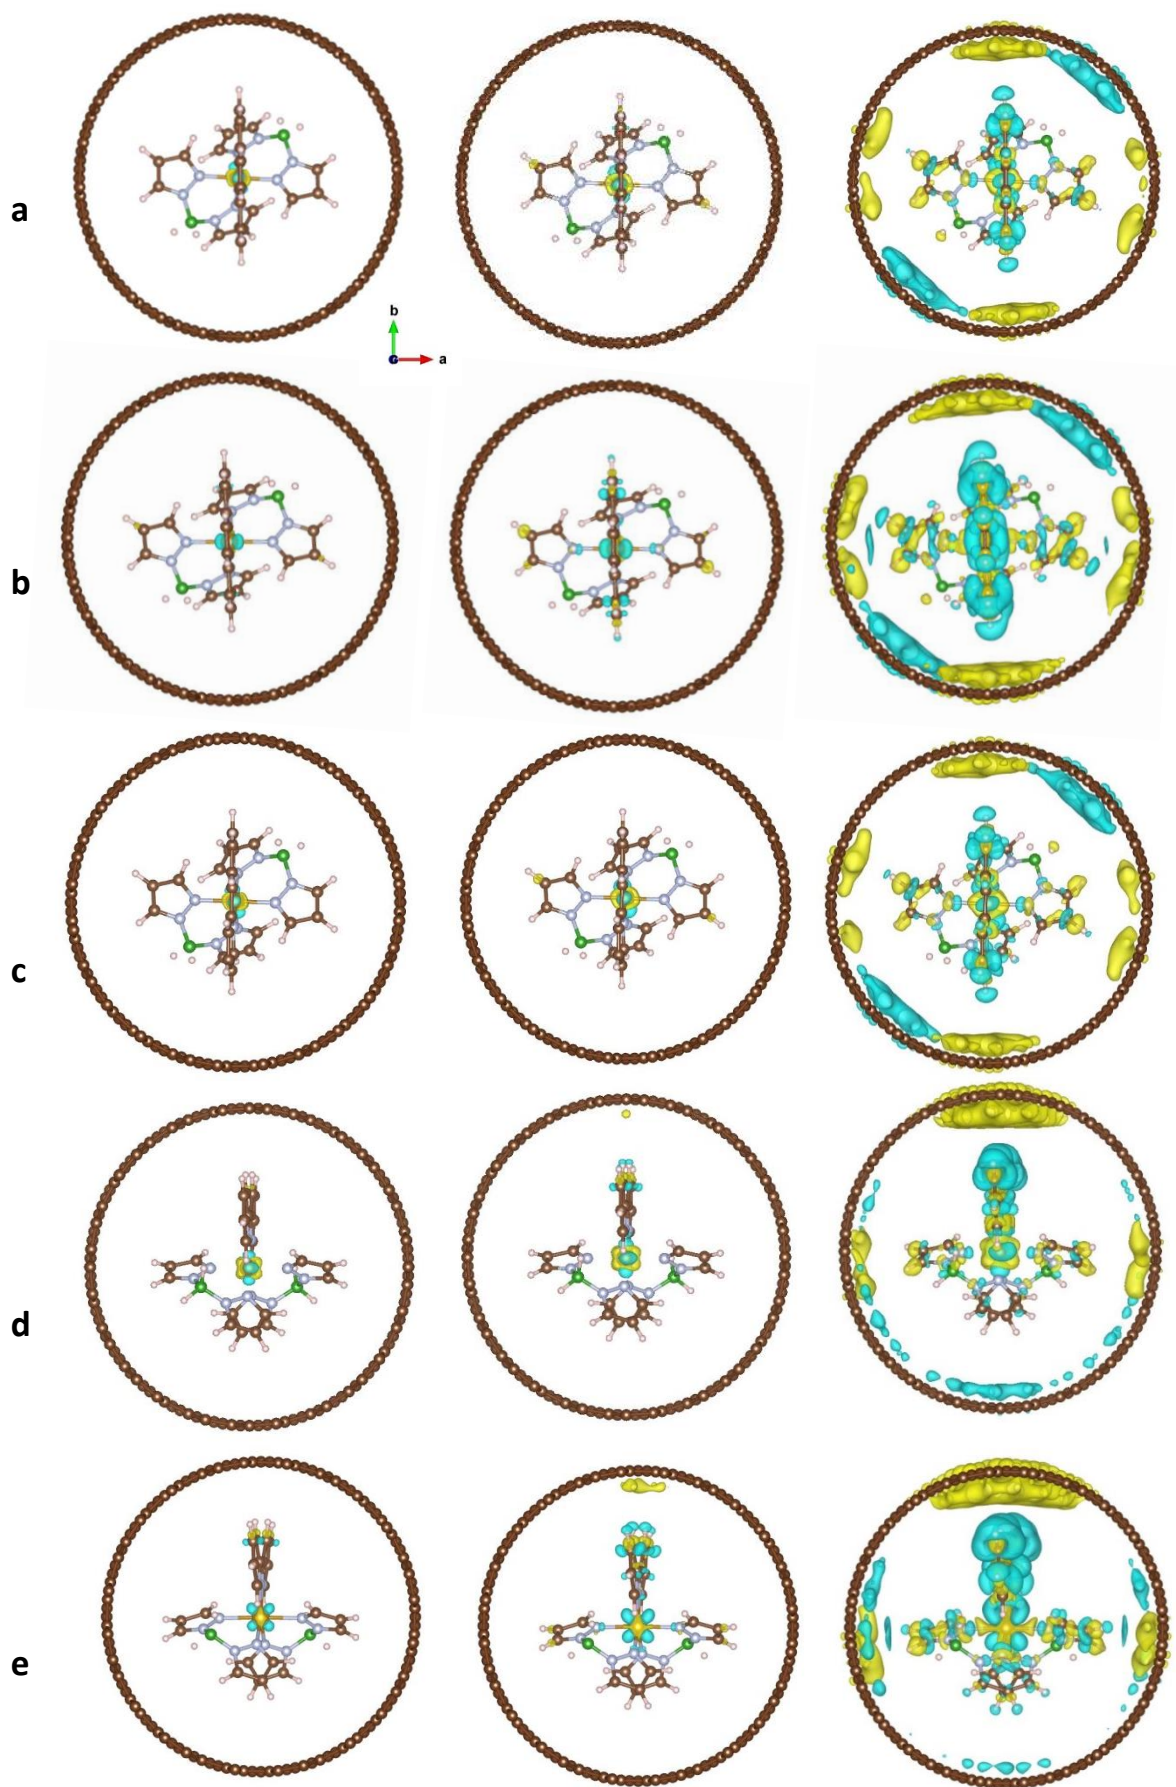

**Figure S3.** Plots of charge density difference, with isodensity values of (left)  $10^{-3}$  e/bohr<sup>3</sup>, (middle)  $5 \cdot 10^{-4}$  e/bohr<sup>3</sup> and (right)  $10^{-4}$  e/bohr<sup>3</sup>: (a) LS SCO1@SWCNT geo2, (b) HS SCO1@SWCNT geo2 (c) LS SCO2@SWCNT geo2, (d) LS SCO2@SWCNT geo1, (e) HS SCO2@SWCNT geo1.

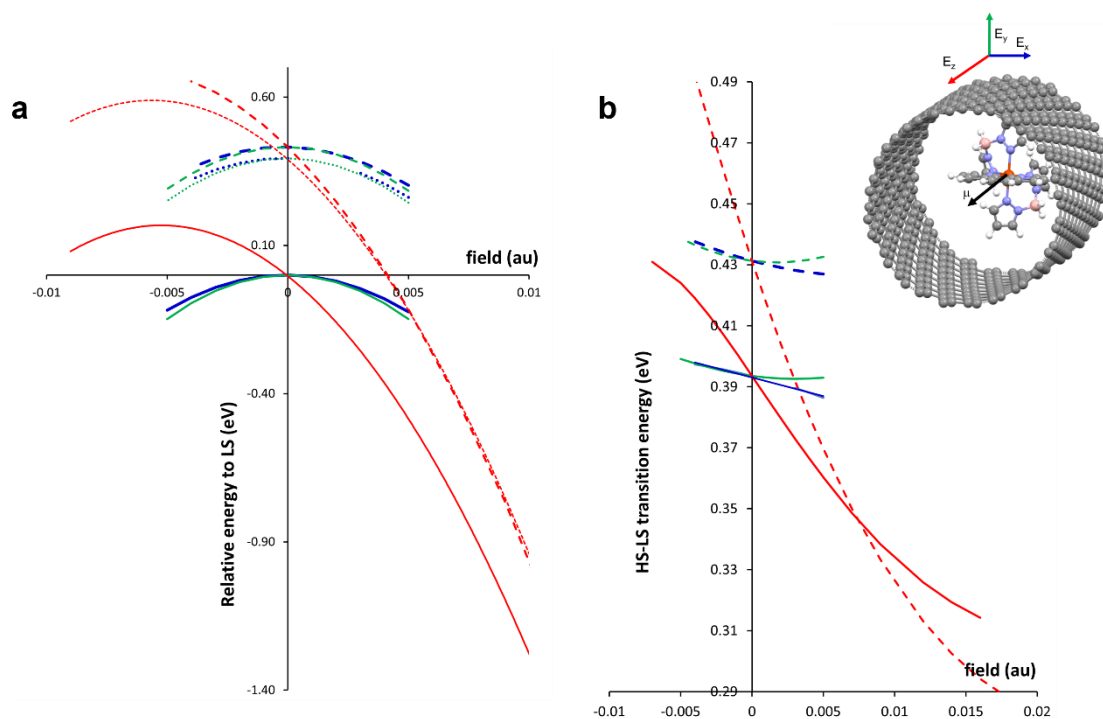

**Figure S4.** (a) Total energy (in eV) of the LS and HS states of SCO1 in presence of an external electric field (in au) along x (blue), y (green) or z (red) axis. Solid lines correspond to LS state, while dashed and dotted lines represent two thermally accessible HS states. (b) Impact of the applied electric field on the HS-LS transition energy (eV). Blue, green and red lines correspond to HS-LS energy under the influence of fields along x, y and z, respectively. The solid (dashed) lines correspond to the energy difference between the LS state and the lowest (excited) HS state in absence of field. The inset represents the optimal orientation of the encapsulated SCO1 complex, the black arrow is the electric dipole moment, and the blue, green and red arrows represent the electric fields along x, y and z axis, respectively.

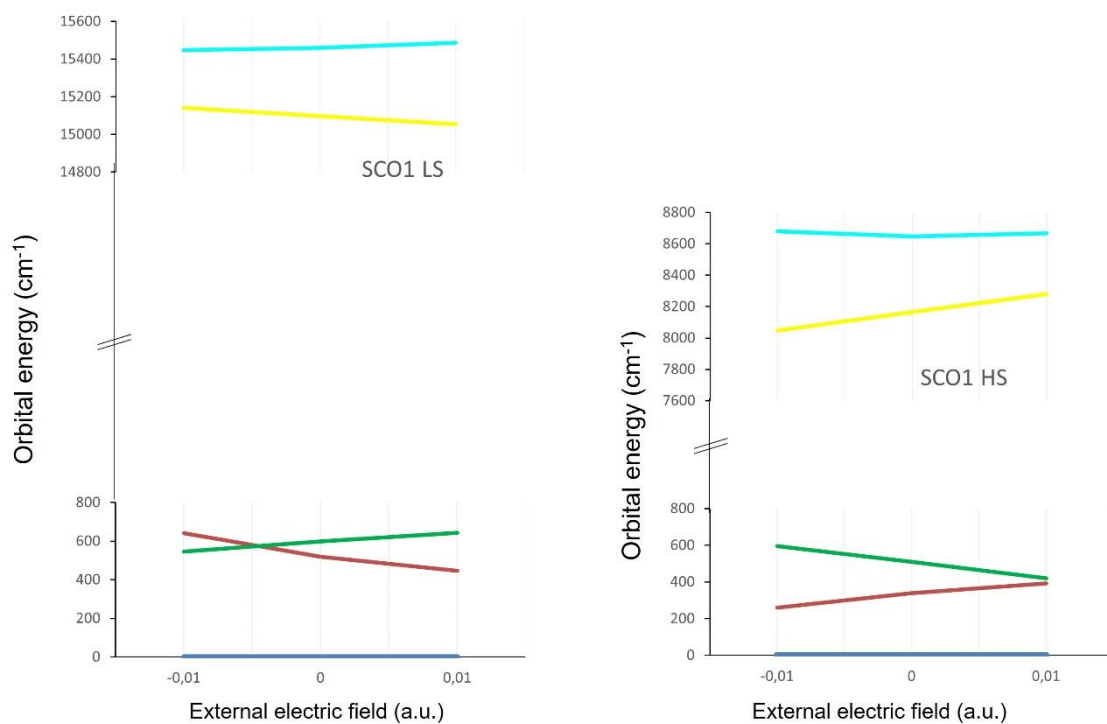

**Figure S5.** Impact of an external electric field applied along z axis (in atomic units) on the relative energies (cm<sup>-1</sup>) of the Fe 3d  $t_{2g}$  (blue, red, and green lines) and  $e_g$ -like (cyan, yellow lines) orbitals for the LS and HS states of SCO1. All the calculations employ the optimized geometry of the encapsulated molecule (geo2).

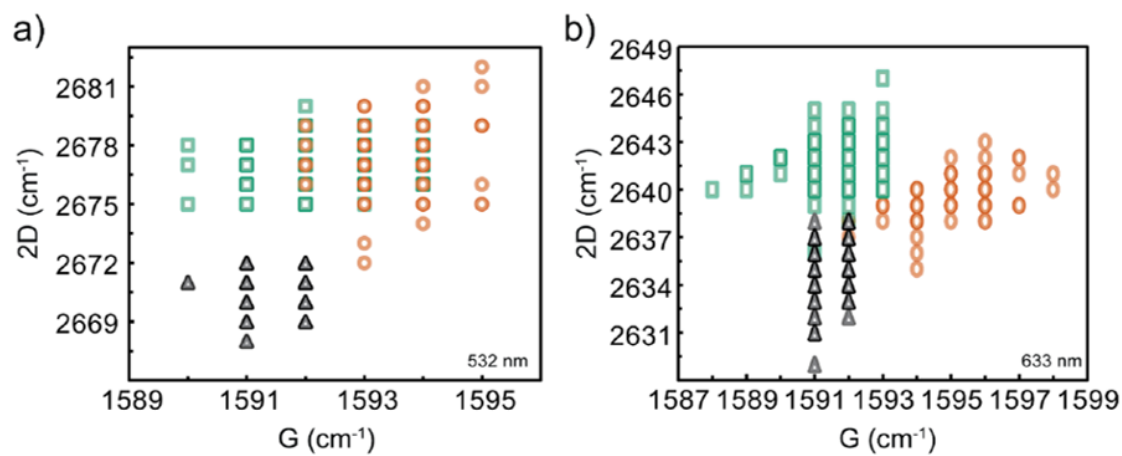

**Figure S6.** Plot of the Raman shift of 2D band vs G band for 100 different spectra ( $\lambda=532$  nm and 633 nm) of open SWCNT (black triangles), SCO1@SWCNT (green squares) and SCO2@SWCNT (orange circles). Data points are shaded to indicate the frequency of occurrence

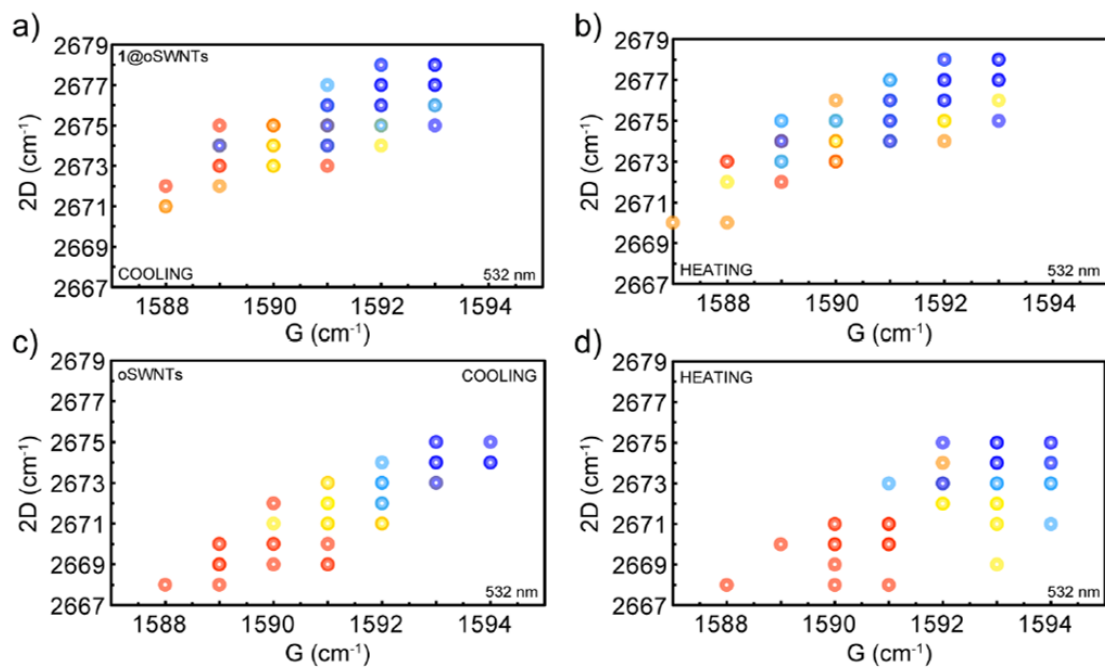

**Figure S7.** G-band displacement in SCO1@SWCNT while cooling (a) and heating (b) and for open SWCNT while cooling(c) and heating (d) for 532 nm laser. The different colours correspond to a temperature scale, from 273 K (red dots) to 153 K (dark blue dots) in intervals of 30 K (orange, yellow and pale blue). For each temperature, 20 different spectra are plotted.

**Table S1.** Fitting of the simulated LS and HS curves to an Arrhenius law for thermally activated electron transport.

$$\sigma/\tau = \frac{\sigma_0}{\tau} e^{(-\frac{B}{T})} + \frac{\sigma_i}{\tau}$$

|                                          | Spin state | $\sigma_0/\tau$ (1/(\Omega*cm*s)) | B (K)   | $\sigma_i/\tau$ (1/(\Omega*m*s)) |
|------------------------------------------|------------|-----------------------------------|---------|----------------------------------|
| No Doping                                | HS         | 3.57E+18                          | 692.82  | 9.52E+14                         |
|                                          | LS         | 6.53E+19                          | 2733.64 | -5.72E+13                        |
| Doping concentration (cm <sup>-3</sup> ) | Spin state | $\sigma_0/\tau$ (1/(\Omega*cm*s)) | B (K)   | $\sigma_i/\tau$ (1/(\Omega*m*s)) |
| 1.3 × 10 <sup>-19</sup>                  | HS         | 2.88E+17                          | 1824.59 | 7.17E+11                         |
|                                          | LS         | 2.10E+18                          | 2710.19 | 8.28E+10                         |
| 1.47 × 10 <sup>-19</sup>                 | HS         | 2.34E+18                          | 2723.70 | 1.54E+12                         |
|                                          | LS         | 2.03E+18                          | 2666.20 | 7.28E+10                         |
| 1.50 × 10 <sup>-19</sup>                 | HS         | 1.68E+13                          | 1907.47 | -1.37E+08                        |
|                                          | LS         | 5.19E+14                          | 2797.94 | -1.49E+07                        |
| Fermi level shift (eV)                   | Spin state | $\sigma_0/\tau$ (1/(\Omega*cm*s)) | B (K)   | $\sigma_i/\tau$ (1/(\Omega*m*s)) |
| -0.135                                   | HS         | 5.25E+18                          | 2367.67 | 6.61E+11                         |
|                                          | LS         | 7.65E+18                          | 2774.40 | 1.36E+11                         |
| -0.155                                   | HS         | 6.22E+18                          | 2546.73 | 3.84E+11                         |
|                                          | LS         | 5.43E+18                          | 2552.44 | 4.36E+11                         |
| -0.164                                   | HS         | 7.91E+18                          | 2716.02 | 1.59E+11                         |
|                                          | LS         | 4.55E+18                          | 2371.14 | 7.57E+11                         |

**Table S2.** The xyz coordinates of the most stable orientation of encapsulated SCO1 and SCO2 complexes. Due to the great length of the files, the rest of the optimized structures will be available on request.

**SCO2@SWCNT: geo1 LS**

507

|   |           |           |           |
|---|-----------|-----------|-----------|
| C | 41.644676 | 33.301273 | 0.000446  |
| C | 41.660015 | 33.301445 | 11.349944 |
| C | 41.645027 | 33.300667 | 3.782935  |
| C | 41.653591 | 33.299995 | 15.133245 |
| C | 41.630077 | 33.770046 | 2.432360  |
| C | 41.639477 | 33.770512 | 13.782486 |
| C | 41.443752 | 35.164059 | 2.161884  |
| C | 41.448746 | 35.163868 | 13.511526 |
| C | 41.331261 | 35.620182 | 0.811482  |
| C | 41.336983 | 35.619587 | 12.160805 |
| C | 40.842777 | 36.938789 | 0.540285  |
| C | 40.843140 | 36.936485 | 11.889983 |
| C | 41.634243 | 33.769508 | 6.214919  |
| C | 41.635941 | 33.769562 | 17.565470 |
| C | 41.594456 | 34.238338 | 4.864371  |
| C | 41.599060 | 34.237858 | 16.214750 |
| C | 41.329632 | 35.618889 | 4.593750  |
| C | 41.332329 | 35.618294 | 15.943701 |
| C | 41.191891 | 36.068035 | 3.243336  |
| C | 41.194290 | 36.067421 | 14.593064 |
| C | 40.628231 | 37.355492 | 2.972148  |
| C | 40.628216 | 37.353741 | 14.321837 |
| C | 40.391777 | 37.761375 | 1.621857  |
| C | 40.391109 | 37.758976 | 12.971457 |
| C | 39.548660 | 38.886784 | 1.350913  |
| C | 39.546753 | 38.883686 | 12.700587 |
| C | 39.225636 | 39.228218 | 0.000326  |
| C | 39.223160 | 39.224590 | 11.350300 |
| C | 41.602932 | 34.237995 | 8.647425  |
| C | 41.596867 | 34.238674 | 19.998224 |
| C | 41.536713 | 34.703056 | 7.296965  |
| C | 41.534863 | 34.703133 | 18.647282 |
| C | 41.193008 | 36.067139 | 7.026144  |
| C | 41.192524 | 36.067326 | 18.376253 |
| C | 41.026104 | 36.506485 | 5.675843  |
| C | 41.027245 | 36.505875 | 17.025679 |
| C | 40.387413 | 37.758282 | 5.404564  |
| C | 40.387482 | 37.757294 | 16.754009 |
| C | 40.128727 | 38.150276 | 4.053937  |
| C | 40.128132 | 38.148392 | 15.403416 |
| C | 39.222649 | 39.224812 | 3.782884  |
| C | 39.221348 | 39.222481 | 15.132422 |
| C | 38.882771 | 39.549538 | 2.432408  |
| C | 38.881191 | 39.546555 | 13.782015 |
| C | 37.757103 | 40.391781 | 2.160912  |
| C | 37.756489 | 40.390232 | 13.511267 |
| C | 37.351334 | 40.628716 | 0.810532  |
| C | 37.351219 | 40.628159 | 12.160927 |

|   |           |           |           |
|---|-----------|-----------|-----------|
| C | 36.064930 | 41.195309 | 0.539285  |
| C | 36.065422 | 41.196476 | 11.889778 |
| C | 41.543884 | 34.703823 | 11.079082 |
| C | 41.533554 | 34.703533 | 22.429729 |
| C | 41.452011 | 35.165680 | 9.728758  |
| C | 41.445812 | 35.166218 | 21.079220 |
| C | 41.032772 | 36.508072 | 9.457956  |
| C | 41.030987 | 36.509480 | 20.808277 |
| C | 40.841015 | 36.937305 | 8.107547  |
| C | 40.840775 | 36.938194 | 19.457449 |
| C | 40.129848 | 38.149895 | 7.836506  |
| C | 40.130127 | 38.150612 | 19.186052 |
| C | 39.846951 | 38.525639 | 6.486108  |
| C | 39.846661 | 38.524860 | 17.835382 |
| C | 38.882515 | 39.548641 | 6.214714  |
| C | 38.881889 | 39.547512 | 17.564192 |
| C | 38.522785 | 39.850449 | 4.864265  |
| C | 38.521980 | 39.848763 | 16.213665 |
| C | 37.352425 | 40.630077 | 4.592765  |
| C | 37.351868 | 40.628967 | 15.942894 |
| C | 36.933487 | 40.842754 | 3.242303  |
| C | 36.933334 | 40.842041 | 14.592564 |
| C | 35.616360 | 41.335331 | 2.971309  |
| C | 35.616428 | 41.336296 | 14.321681 |
| C | 35.160473 | 41.447689 | 1.620686  |
| C | 35.160915 | 41.450191 | 12.971205 |
| C | 33.766426 | 41.634472 | 1.350379  |
| C | 33.766727 | 41.638248 | 12.700429 |
| C | 33.296291 | 41.648842 | 22.699888 |
| C | 33.296173 | 41.656013 | 11.349537 |
| C | 40.630684 | 37.356201 | 10.539800 |
| C | 40.630512 | 37.358467 | 21.889997 |
| C | 39.851170 | 38.526924 | 10.268950 |
| C | 39.852955 | 38.529793 | 21.618868 |
| C | 39.547935 | 38.885777 | 8.918572  |
| C | 39.549133 | 38.887409 | 20.268082 |
| C | 38.524406 | 39.849792 | 8.647375  |
| C | 38.525230 | 39.850861 | 19.996933 |
| C | 38.147842 | 40.131836 | 7.296793  |
| C | 38.147720 | 40.131618 | 18.646458 |
| C | 36.935028 | 40.842716 | 7.025517  |
| C | 36.934906 | 40.842461 | 18.375614 |
| C | 36.504864 | 41.032364 | 5.674903  |
| C | 36.504906 | 41.032143 | 17.024961 |
| C | 35.161594 | 41.449608 | 5.403619  |
| C | 35.161667 | 41.449909 | 16.754213 |
| C | 34.699314 | 41.538815 | 4.052989  |
| C | 34.699455 | 41.539455 | 15.403597 |
| C | 33.296513 | 41.650261 | 3.782589  |
| C | 33.296432 | 41.652229 | 15.133068 |
| C | 32.826370 | 41.635231 | 2.432037  |
| C | 32.826355 | 41.638500 | 13.782309 |
| C | 31.432636 | 41.446243 | 2.161496  |
| C | 31.432299 | 41.449039 | 13.511546 |
| C | 30.976713 | 41.334713 | 0.810881  |
| C | 30.976151 | 41.338100 | 12.160688 |



|   |           |           |           |
|---|-----------|-----------|-----------|
| C | 29.658436 | 40.843788 | 0.540070  |
| C | 29.658615 | 40.843941 | 11.889792 |
| C | 38.147293 | 40.130089 | 11.079590 |
| C | 38.148159 | 40.131477 | 22.429108 |
| C | 37.756409 | 40.389614 | 9.728862  |
| C | 37.757069 | 40.390781 | 21.078388 |
| C | 36.504971 | 41.031029 | 9.457767  |
| C | 36.504635 | 41.029980 | 20.807478 |
| C | 36.065357 | 41.196396 | 8.107035  |
| C | 36.064877 | 41.195980 | 19.457081 |
| C | 34.700684 | 41.539032 | 7.835720  |
| C | 34.700291 | 41.538116 | 19.186405 |
| C | 34.234398 | 41.601727 | 6.485020  |
| C | 34.234459 | 41.601807 | 17.835703 |
| C | 32.827248 | 41.637714 | 6.214591  |
| C | 32.827309 | 41.638058 | 17.565166 |
| C | 32.358521 | 41.597916 | 4.863824  |
| C | 32.358326 | 41.599113 | 16.214548 |
| C | 30.977734 | 41.331219 | 4.593452  |
| C | 30.977690 | 41.331619 | 15.943438 |
| C | 30.528030 | 41.193707 | 3.242778  |
| C | 30.527464 | 41.194527 | 14.592879 |
| C | 29.240612 | 40.628269 | 2.971989  |
| C | 29.240686 | 40.627529 | 14.321286 |
| C | 28.835442 | 40.390690 | 1.621347  |
| C | 28.836073 | 40.388981 | 12.970623 |
| C | 27.712219 | 39.543816 | 1.350394  |
| C | 27.713671 | 39.539562 | 12.699947 |
| C | 27.373013 | 39.219563 | 22.699526 |
| C | 27.374754 | 39.213448 | 11.349720 |
| C | 35.616348 | 41.336437 | 10.539430 |
| C | 35.615841 | 41.333641 | 21.889059 |
| C | 34.235126 | 41.603569 | 10.268247 |
| C | 34.234493 | 41.598396 | 21.618528 |
| C | 33.766369 | 41.640030 | 8.917431  |
| C | 33.765808 | 41.636570 | 20.268066 |
| C | 32.358864 | 41.604126 | 8.646912  |
| C | 32.359039 | 41.601089 | 19.997545 |
| C | 31.893196 | 41.539608 | 7.296338  |
| C | 31.893549 | 41.539139 | 18.646858 |
| C | 30.528975 | 41.194393 | 7.025691  |
| C | 30.529266 | 41.195080 | 18.375591 |
| C | 30.089653 | 41.026291 | 5.675357  |
| C | 30.089634 | 41.026657 | 17.025312 |
| C | 28.838516 | 40.385189 | 5.404769  |
| C | 28.838223 | 40.385807 | 16.753576 |
| C | 28.446915 | 40.125957 | 4.053940  |
| C | 28.446697 | 40.125244 | 15.402957 |
| C | 27.373411 | 39.217400 | 3.783111  |
| C | 27.373827 | 39.215290 | 15.131863 |
| C | 27.049648 | 38.878033 | 2.432200  |
| C | 27.051411 | 38.873325 | 13.781309 |
| C | 26.207022 | 37.752800 | 2.160864  |
| C | 26.208136 | 37.747871 | 13.510620 |
| C | 25.969738 | 37.347275 | 0.810214  |
| C | 25.969587 | 37.340870 | 12.160478 |

|   |           |           |           |
|---|-----------|-----------|-----------|
| C | 25.400505 | 36.062237 | 0.539381  |
| C | 25.394032 | 36.057541 | 11.889614 |
| C | 31.893192 | 41.543209 | 11.079015 |
| C | 31.893965 | 41.537914 | 22.429148 |
| C | 31.430868 | 41.453518 | 9.728214  |
| C | 31.431486 | 41.449638 | 21.078728 |
| C | 30.088106 | 41.033264 | 9.457572  |
| C | 30.087883 | 41.033531 | 20.807478 |
| C | 29.658689 | 40.840946 | 8.107220  |
| C | 29.658567 | 40.842487 | 19.456587 |
| C | 28.447868 | 40.125198 | 7.836528  |
| C | 28.447060 | 40.127987 | 19.185141 |
| C | 28.072409 | 39.841915 | 6.486121  |
| C | 28.071438 | 39.843925 | 17.834799 |
| C | 27.050735 | 38.874760 | 6.215083  |
| C | 27.049578 | 38.877125 | 17.563511 |
| C | 26.748011 | 38.515965 | 4.864315  |
| C | 26.747179 | 38.516132 | 16.213192 |
| C | 25.966978 | 37.346626 | 4.592999  |
| C | 25.967081 | 37.345726 | 15.942251 |
| C | 25.754484 | 36.929165 | 3.242067  |
| C | 25.754320 | 36.925926 | 14.592010 |
| C | 25.260029 | 35.612965 | 2.971210  |
| C | 25.256567 | 35.610374 | 14.321355 |
| C | 25.146847 | 35.157516 | 1.620657  |
| C | 25.137098 | 35.154015 | 12.971184 |
| C | 24.958961 | 33.764160 | 1.349686  |
| C | 24.941019 | 33.760693 | 12.700839 |
| C | 24.941053 | 33.293953 | 22.699398 |
| C | 24.919106 | 33.290371 | 11.350078 |
| C | 29.240284 | 40.628845 | 10.539412 |
| C | 29.239759 | 40.630707 | 21.889425 |
| C | 28.072809 | 39.843140 | 10.268595 |
| C | 28.070337 | 39.849098 | 21.618008 |
| C | 27.714212 | 39.538063 | 8.918391  |
| C | 27.712620 | 39.543560 | 20.267408 |
| C | 26.750767 | 38.513153 | 8.647544  |
| C | 26.749485 | 38.518852 | 19.996210 |
| C | 26.466991 | 38.139183 | 7.296958  |
| C | 26.466167 | 38.143185 | 18.645834 |
| C | 25.753458 | 36.927559 | 7.025812  |
| C | 25.754330 | 36.930561 | 18.374971 |
| C | 25.561758 | 36.499634 | 5.675037  |
| C | 25.562267 | 36.500168 | 17.024876 |
| C | 25.141829 | 35.157093 | 5.403786  |
| C | 25.142860 | 35.157013 | 16.754175 |
| C | 25.055836 | 34.695919 | 4.052898  |
| C | 25.053633 | 34.694942 | 15.403864 |
| C | 24.942181 | 33.293633 | 3.781776  |
| C | 24.936609 | 33.292431 | 15.133260 |
| C | 24.958187 | 32.824375 | 2.431206  |
| C | 24.946466 | 32.821091 | 13.782887 |
| C | 25.147385 | 31.431374 | 2.160709  |
| C | 25.136209 | 31.428251 | 13.511693 |
| C | 25.258570 | 30.975401 | 0.810314  |
| C | 25.244909 | 30.971647 | 12.160648 |

|   |           |           |           |
|---|-----------|-----------|-----------|
| C | 25.750269 | 29.657406 | 0.539518  |
| C | 25.743322 | 29.655676 | 11.889893 |
| C | 26.469803 | 38.136131 | 11.079088 |
| C | 26.468493 | 38.143089 | 22.428480 |
| C | 26.208374 | 37.745968 | 9.728738  |
| C | 26.208845 | 37.751957 | 21.077965 |
| C | 25.560471 | 36.497589 | 9.457926  |
| C | 25.565849 | 36.501301 | 20.807034 |
| C | 25.394430 | 36.058640 | 8.107018  |
| C | 25.399319 | 36.061642 | 19.456537 |
| C | 25.044209 | 34.695770 | 7.835900  |
| C | 25.054235 | 34.697529 | 19.186018 |
| C | 24.984362 | 34.229923 | 6.484845  |
| C | 24.989067 | 34.230671 | 17.835625 |
| C | 24.949007 | 32.823269 | 6.214060  |
| C | 24.953062 | 32.824142 | 17.564936 |
| C | 24.991709 | 32.355743 | 4.863147  |
| C | 24.989700 | 32.355206 | 16.214500 |
| C | 25.261599 | 30.976679 | 4.592396  |
| C | 25.258478 | 30.975880 | 15.943459 |
| C | 25.402061 | 30.528034 | 3.242134  |
| C | 25.396530 | 30.525826 | 14.593158 |
| C | 25.968601 | 29.241787 | 2.971075  |
| C | 25.965948 | 29.241108 | 14.321548 |
| C | 26.203266 | 28.834902 | 1.620815  |
| C | 26.200676 | 28.835142 | 12.971027 |
| C | 27.047632 | 27.710293 | 1.349958  |
| C | 27.047829 | 27.712706 | 12.699798 |
| C | 27.371538 | 27.370625 | 22.699265 |
| C | 27.372204 | 27.373028 | 11.349534 |
| C | 25.247572 | 35.609776 | 10.539120 |
| C | 25.258648 | 35.613674 | 21.888948 |
| C | 24.969114 | 34.229691 | 10.268536 |
| C | 24.990471 | 34.232735 | 21.618498 |
| C | 24.932585 | 33.760971 | 8.917492  |
| C | 24.952164 | 33.764118 | 20.268026 |
| C | 24.971558 | 32.353748 | 8.646797  |
| C | 24.988663 | 32.357166 | 19.997280 |
| C | 25.046518 | 31.889874 | 7.296009  |
| C | 25.054043 | 31.891665 | 18.646826 |
| C | 25.398891 | 30.528255 | 7.024904  |
| C | 25.401731 | 30.528965 | 18.375763 |
| C | 25.568378 | 30.090269 | 5.674463  |
| C | 25.568018 | 30.090307 | 17.025322 |
| C | 26.211098 | 28.840456 | 5.403605  |
| C | 26.210730 | 28.840620 | 16.753614 |
| C | 26.470369 | 28.448792 | 4.053119  |
| C | 26.469988 | 28.449345 | 15.403235 |
| C | 27.375221 | 27.373337 | 3.782351  |
| C | 27.376341 | 27.375305 | 15.131711 |
| C | 27.714373 | 27.048296 | 2.431547  |
| C | 27.715307 | 27.051016 | 13.780909 |
| C | 28.840637 | 26.206524 | 2.160942  |
| C | 28.841846 | 26.209311 | 13.510357 |
| C | 29.247044 | 25.971163 | 0.810267  |
| C | 29.247282 | 25.972273 | 12.160046 |

|   |           |           |           |
|---|-----------|-----------|-----------|
| C | 30.533634 | 25.405096 | 0.539554  |
| C | 30.533409 | 25.405647 | 11.889346 |
| C | 25.034279 | 31.887854 | 11.079085 |
| C | 25.053316 | 31.891716 | 22.428885 |
| C | 25.126005 | 31.426439 | 9.728238  |
| C | 25.142221 | 31.429958 | 21.078327 |
| C | 25.554171 | 30.086184 | 9.457373  |
| C | 25.561335 | 30.087423 | 20.807364 |
| C | 25.751680 | 29.658806 | 8.106748  |
| C | 25.754425 | 29.659027 | 19.456846 |
| C | 26.467028 | 28.448683 | 7.835892  |
| C | 26.467192 | 28.447592 | 19.185503 |
| C | 26.752190 | 28.074221 | 6.485484  |
| C | 26.751865 | 28.073706 | 17.834972 |
| C | 27.716553 | 27.051296 | 6.214338  |
| C | 27.716740 | 27.051226 | 17.563768 |
| C | 28.074926 | 26.747530 | 4.863749  |
| C | 28.075867 | 26.749235 | 16.213093 |
| C | 29.245111 | 25.967514 | 4.592647  |
| C | 29.245903 | 25.969170 | 15.942387 |
| C | 29.663895 | 25.755024 | 3.242190  |
| C | 29.664612 | 25.757111 | 14.591774 |
| C | 30.981268 | 25.262930 | 2.971529  |
| C | 30.981323 | 25.263931 | 14.321201 |
| C | 31.437296 | 25.151161 | 1.621052  |
| C | 31.437229 | 25.151978 | 12.970665 |
| C | 32.830486 | 24.961500 | 1.350212  |
| C | 32.830437 | 24.962698 | 12.699903 |
| C | 33.300968 | 24.943468 | 22.699760 |
| C | 33.300957 | 24.945391 | 11.349631 |
| C | 25.958572 | 29.238300 | 10.539174 |
| C | 25.962765 | 29.238672 | 21.888924 |
| C | 26.742687 | 28.069979 | 10.268233 |
| C | 26.742947 | 28.068434 | 21.617878 |
| C | 27.049509 | 27.713360 | 8.917942  |
| C | 27.048798 | 27.711323 | 20.267435 |
| C | 28.075190 | 26.751345 | 8.647120  |
| C | 28.074467 | 26.749392 | 19.996603 |
| C | 28.451328 | 26.468716 | 7.296634  |
| C | 28.451492 | 26.468182 | 18.646107 |
| C | 29.663900 | 25.757759 | 7.025602  |
| C | 29.663586 | 25.756281 | 18.375259 |
| C | 30.093319 | 25.566181 | 5.675039  |
| C | 30.093102 | 25.565603 | 17.024582 |
| C | 31.435717 | 25.146847 | 5.404007  |
| C | 31.435404 | 25.146425 | 16.753595 |
| C | 31.897396 | 25.057333 | 4.053253  |
| C | 31.897217 | 25.058117 | 15.402859 |
| C | 33.299782 | 24.944195 | 3.782725  |
| C | 33.299461 | 24.945461 | 15.132179 |
| C | 33.770142 | 24.961317 | 2.432236  |
| C | 33.769829 | 24.962839 | 13.781700 |
| C | 35.163376 | 25.151268 | 2.161478  |
| C | 35.163044 | 25.152428 | 13.511155 |
| C | 35.619602 | 25.262327 | 0.811069  |
| C | 35.618908 | 25.264648 | 12.160820 |

|   |           |           |           |
|---|-----------|-----------|-----------|
| C | 36.937355 | 25.753544 | 0.540336  |
| C | 36.936069 | 25.757408 | 11.890213 |
| C | 28.450581 | 26.470173 | 11.078753 |
| C | 28.450626 | 26.468925 | 22.428812 |
| C | 28.843311 | 26.211672 | 9.728558  |
| C | 28.842960 | 26.210243 | 21.078188 |
| C | 30.094984 | 25.571430 | 9.457644  |
| C | 30.094620 | 25.570063 | 20.807322 |
| C | 30.533812 | 25.404396 | 8.107019  |
| C | 30.533506 | 25.402706 | 19.456758 |
| C | 31.897625 | 25.060186 | 7.836293  |
| C | 31.897081 | 25.057831 | 19.185596 |
| C | 32.363342 | 24.995340 | 6.485569  |
| C | 32.363026 | 24.993826 | 17.834959 |
| C | 33.769966 | 24.958839 | 6.215147  |
| C | 33.769543 | 24.958431 | 17.564577 |
| C | 34.237499 | 24.997120 | 4.864299  |
| C | 34.237289 | 24.997173 | 16.213806 |
| C | 35.617676 | 25.265881 | 4.593543  |
| C | 35.617405 | 25.266163 | 15.943221 |
| C | 36.067047 | 25.404510 | 3.243231  |
| C | 36.066563 | 25.406105 | 14.592893 |
| C | 37.353497 | 25.970934 | 2.972317  |
| C | 37.352848 | 25.972239 | 14.321984 |
| C | 37.760128 | 26.206112 | 1.621819  |
| C | 37.758312 | 26.209723 | 12.971514 |
| C | 38.885265 | 27.049475 | 1.350987  |
| C | 38.882732 | 27.054041 | 12.700534 |
| C | 39.225986 | 27.372885 | 0.000402  |
| C | 39.223621 | 27.377773 | 11.350226 |
| C | 30.982645 | 25.265911 | 10.539414 |
| C | 30.982700 | 25.265217 | 21.889191 |
| C | 32.362919 | 24.997803 | 10.268638 |
| C | 32.362930 | 24.996313 | 21.618383 |
| C | 32.831299 | 24.959244 | 8.918245  |
| C | 32.830780 | 24.957392 | 20.267641 |
| C | 34.237991 | 24.995241 | 8.647916  |
| C | 34.237598 | 24.992804 | 19.997368 |
| C | 34.703266 | 25.059566 | 7.297313  |
| C | 34.703255 | 25.058392 | 18.646723 |
| C | 36.066860 | 25.404306 | 7.026008  |
| C | 36.066601 | 25.403257 | 18.375826 |
| C | 36.505341 | 25.570871 | 5.675478  |
| C | 36.505238 | 25.570801 | 17.025177 |
| C | 37.756454 | 26.211987 | 5.404740  |
| C | 37.756012 | 26.211990 | 16.754187 |
| C | 38.148674 | 26.470333 | 4.054033  |
| C | 38.147873 | 26.471577 | 15.403811 |
| C | 39.224453 | 27.374857 | 3.783064  |
| C | 39.222622 | 27.377413 | 15.132574 |
| C | 39.548790 | 27.714527 | 2.432534  |
| C | 39.546474 | 27.718187 | 13.782149 |
| C | 40.391956 | 28.839838 | 2.161597  |
| C | 40.390770 | 28.842731 | 13.511157 |
| C | 40.627663 | 29.245827 | 0.810998  |
| C | 40.628551 | 29.248497 | 12.160909 |

|   |           |           |           |
|---|-----------|-----------|-----------|
| C | 41.192120 | 30.532867 | 0.539898  |
| C | 41.198391 | 30.533432 | 11.889747 |
| C | 34.703125 | 25.059435 | 11.079211 |
| C | 34.703709 | 25.055574 | 22.429163 |
| C | 35.165497 | 25.147678 | 9.729043  |
| C | 35.165649 | 25.144920 | 21.078657 |
| C | 36.507904 | 25.566120 | 9.458146  |
| C | 36.508209 | 25.563770 | 20.807915 |
| C | 36.936951 | 25.757620 | 8.107658  |
| C | 36.937065 | 25.755753 | 19.457123 |
| C | 38.148781 | 26.469532 | 7.836613  |
| C | 38.148705 | 26.468351 | 19.186094 |
| C | 38.523308 | 26.753473 | 6.486227  |
| C | 38.523132 | 26.753077 | 17.835707 |
| C | 39.546402 | 27.717386 | 6.215086  |
| C | 39.545467 | 27.717718 | 17.564478 |
| C | 39.849907 | 28.074759 | 4.864343  |
| C | 39.848644 | 28.076529 | 16.213961 |
| C | 40.629623 | 29.244625 | 4.593385  |
| C | 40.629417 | 29.245962 | 15.942816 |
| C | 40.842106 | 29.663689 | 3.243051  |
| C | 40.843876 | 29.664576 | 14.592595 |
| C | 41.332874 | 30.981178 | 2.972126  |
| C | 41.337948 | 30.981441 | 14.321904 |
| C | 41.444839 | 31.436831 | 1.621641  |
| C | 41.453156 | 31.436926 | 12.971454 |
| C | 41.630630 | 32.830757 | 1.350805  |
| C | 41.642834 | 32.830379 | 12.700499 |
| C | 37.355549 | 25.969225 | 10.539865 |
| C | 37.356705 | 25.965775 | 21.889927 |
| C | 38.525314 | 26.750343 | 10.269110 |
| C | 38.527340 | 26.745518 | 21.618923 |
| C | 38.883495 | 27.053288 | 8.918673  |
| C | 38.884556 | 27.050098 | 20.268339 |
| C | 39.846909 | 28.076941 | 8.647615  |
| C | 39.846897 | 28.075232 | 19.997238 |
| C | 40.129902 | 28.451984 | 7.297185  |
| C | 40.128979 | 28.451756 | 18.646889 |
| C | 40.841335 | 29.664204 | 7.026106  |
| C | 40.839783 | 29.664242 | 18.376028 |
| C | 41.031361 | 30.092831 | 5.675366  |
| C | 41.031479 | 30.093342 | 17.025372 |
| C | 41.446480 | 31.436037 | 5.404297  |
| C | 41.449379 | 31.435760 | 16.754578 |
| C | 41.534683 | 31.898394 | 4.053910  |
| C | 41.540703 | 31.897602 | 15.404225 |
| C | 40.128841 | 28.453524 | 11.079394 |
| C | 40.129524 | 28.449980 | 22.429382 |
| C | 40.388119 | 28.844252 | 9.728513  |
| C | 40.387169 | 28.842649 | 21.078758 |
| C | 41.030960 | 30.094513 | 9.457598  |
| C | 41.025818 | 30.094576 | 20.807747 |
| C | 41.195824 | 30.533745 | 8.107100  |
| C | 41.191902 | 30.534157 | 19.457409 |
| C | 41.538277 | 31.897673 | 7.836078  |
| C | 41.535446 | 31.898188 | 19.186668 |

|   |           |           |           |
|---|-----------|-----------|-----------|
| C | 41.599068 | 32.363148 | 6.485432  |
| C | 41.600269 | 32.363049 | 17.835968 |
| C | 41.339455 | 30.982195 | 10.539196 |
| C | 41.330120 | 30.982550 | 21.889692 |
| C | 41.607655 | 32.363102 | 10.268424 |
| C | 41.594433 | 32.363693 | 21.618979 |
| C | 41.641575 | 32.831394 | 8.917679  |
| C | 41.633492 | 32.832199 | 20.268471 |
| C | 33.112228 | 34.653610 | 14.042661 |
| C | 33.437733 | 34.646210 | 8.768672  |
| C | 33.021469 | 35.768581 | 14.877475 |
| C | 33.527290 | 35.757061 | 7.930357  |
| C | 32.994125 | 37.050564 | 14.310398 |
| C | 33.547905 | 37.041191 | 8.494223  |
| C | 33.093071 | 37.159660 | 12.922288 |
| C | 33.443684 | 37.156181 | 9.881904  |
| C | 33.199326 | 36.000088 | 12.134015 |
| C | 33.341751 | 35.999004 | 10.674669 |
| C | 34.127403 | 30.816364 | 13.059660 |
| C | 32.414082 | 30.831289 | 9.732432  |
| C | 33.630238 | 29.859642 | 13.958935 |
| C | 32.904530 | 29.875443 | 8.828535  |
| C | 32.318462 | 30.264809 | 14.211169 |
| C | 34.218464 | 30.273430 | 8.576482  |
| C | 30.503525 | 33.622612 | 10.142004 |
| C | 36.047150 | 33.610802 | 12.654268 |
| C | 29.146870 | 33.331455 | 10.351192 |
| C | 37.403320 | 33.320000 | 12.443730 |
| C | 29.110531 | 32.734009 | 11.611512 |
| C | 37.438515 | 32.724541 | 11.181881 |
| B | 30.751589 | 32.242363 | 13.561894 |
| B | 35.795673 | 32.241150 | 9.231513  |
| H | 30.893490 | 33.227894 | 14.265798 |
| H | 35.657585 | 33.229553 | 8.530616  |
| H | 29.862461 | 31.528889 | 13.984015 |
| H | 36.681908 | 31.525648 | 8.806569  |
| H | 33.132484 | 33.649086 | 14.453735 |
| H | 33.420929 | 33.640503 | 8.361400  |
| H | 32.961197 | 35.619694 | 15.955760 |
| H | 33.591354 | 35.605690 | 6.852717  |
| H | 32.908749 | 37.941944 | 14.932820 |
| H | 33.632053 | 37.930920 | 7.869134  |
| H | 33.090248 | 38.140339 | 12.449868 |
| H | 33.442116 | 38.139091 | 10.349542 |
| H | 35.098949 | 30.862881 | 12.583028 |
| H | 31.443316 | 30.879845 | 10.210033 |
| H | 34.147034 | 28.993176 | 14.357262 |
| H | 32.383900 | 29.011574 | 8.429405  |
| H | 31.545250 | 29.835148 | 14.839811 |
| H | 34.989532 | 29.841646 | 7.946845  |
| H | 30.971100 | 34.064293 | 9.271411  |
| H | 35.580067 | 34.050003 | 13.526457 |
| H | 28.318260 | 33.521259 | 9.678639  |
| H | 38.232388 | 33.505409 | 13.116961 |
| H | 28.283710 | 32.349876 | 12.198123 |
| H | 38.264122 | 32.339691 | 10.593990 |

|    |           |           |           |
|----|-----------|-----------|-----------|
| N  | 33.181282 | 34.740978 | 12.688046 |
| N  | 33.366936 | 34.739128 | 10.122609 |
| N  | 33.184761 | 31.756866 | 12.794194 |
| N  | 33.361973 | 31.764576 | 10.001302 |
| N  | 31.246082 | 33.234112 | 11.210379 |
| N  | 35.303413 | 33.225792 | 11.586524 |
| N  | 32.065208 | 31.398348 | 13.506020 |
| N  | 34.478741 | 31.402872 | 9.286264  |
| N  | 30.371254 | 32.684612 | 12.111476 |
| N  | 36.176991 | 32.677708 | 10.683095 |
| Fe | 33.274883 | 33.247841 | 11.401550 |



**SCO1@SWCNT: geo2 LS**

509

|   |           |           |           |
|---|-----------|-----------|-----------|
| C | 62.372818 | 53.940899 | 11.395301 |
| C | 62.378979 | 53.940395 | 22.744152 |
| C | 62.371819 | 53.941505 | 15.178696 |
| C | 62.377422 | 53.940083 | 26.527716 |
| C | 62.361122 | 54.409843 | 13.828872 |
| C | 62.365429 | 54.408970 | 25.177895 |
| C | 62.167114 | 55.802864 | 13.560872 |
| C | 62.169025 | 55.801941 | 24.910774 |
| C | 62.049698 | 56.257595 | 12.211492 |
| C | 62.052898 | 56.257435 | 23.561232 |
| C | 61.549385 | 57.572025 | 11.943306 |
| C | 61.551346 | 57.571659 | 23.293148 |
| C | 62.359131 | 54.410545 | 17.612314 |
| C | 62.363560 | 54.409405 | 28.962175 |
| C | 62.320713 | 54.878513 | 16.262617 |
| C | 62.325878 | 54.877159 | 27.611952 |
| C | 62.051006 | 56.258255 | 15.994570 |
| C | 62.054508 | 56.256859 | 27.344223 |
| C | 61.908817 | 56.705673 | 14.644168 |
| C | 61.910812 | 56.704399 | 25.994053 |
| C | 61.336857 | 57.990910 | 14.374799 |
| C | 61.338017 | 57.989235 | 25.723965 |
| C | 61.097885 | 58.395313 | 13.024618 |
| C | 61.099274 | 58.394535 | 24.374310 |
| C | 60.256111 | 59.521820 | 12.755984 |
| C | 60.257168 | 59.520992 | 24.105391 |
| C | 59.934483 | 59.863808 | 11.405905 |
| C | 59.934452 | 59.862896 | 22.755789 |
| C | 62.321751 | 54.877953 | 20.044939 |
| C | 62.323509 | 54.877583 | 31.395615 |
| C | 62.254257 | 55.343727 | 18.695414 |
| C | 62.258808 | 55.342693 | 30.045727 |
| C | 61.906898 | 56.706318 | 18.427990 |
| C | 61.910213 | 56.704910 | 29.777868 |
| C | 61.741833 | 57.145737 | 17.077242 |
| C | 61.744774 | 57.144043 | 28.427187 |
| C | 61.100628 | 58.397011 | 16.807278 |
| C | 61.102745 | 58.394989 | 28.156395 |
| C | 60.841358 | 58.788311 | 15.457178 |
| C | 60.842541 | 58.786270 | 26.806431 |
| C | 59.938114 | 59.866398 | 15.189074 |
| C | 59.939445 | 59.864857 | 26.538239 |
| C | 59.596859 | 60.190464 | 13.839024 |
| C | 59.597454 | 60.189060 | 25.188202 |
| C | 58.475304 | 61.038898 | 13.569790 |
| C | 58.474575 | 61.035751 | 24.919300 |
| C | 58.069881 | 61.277164 | 12.219484 |
| C | 58.068527 | 61.273849 | 23.569523 |
| C | 56.787476 | 61.854473 | 11.948507 |
| C | 56.785355 | 61.849491 | 23.297808 |
| C | 62.260353 | 55.342216 | 22.478300 |
| C | 62.255737 | 55.342285 | 11.128757 |

|   |           |           |           |
|---|-----------|-----------|-----------|
| C | 62.167313 | 55.803062 | 21.127970 |
| C | 62.165703 | 55.802723 | 32.478413 |
| C | 61.740849 | 57.143784 | 20.860847 |
| C | 61.740509 | 57.143433 | 32.211021 |
| C | 61.549576 | 57.573494 | 19.511110 |
| C | 61.551380 | 57.572426 | 30.860867 |
| C | 60.838623 | 58.785954 | 19.241049 |
| C | 60.840424 | 58.784775 | 30.590126 |
| C | 60.559322 | 59.163971 | 17.890570 |
| C | 60.562019 | 59.162868 | 29.239210 |
| C | 59.596611 | 60.189163 | 17.622763 |
| C | 59.599762 | 60.188499 | 28.971685 |
| C | 59.239563 | 60.493294 | 16.272245 |
| C | 59.241314 | 60.491634 | 27.621599 |
| C | 58.071926 | 61.276203 | 16.002110 |
| C | 58.071278 | 61.270985 | 27.351843 |
| C | 57.654552 | 61.494366 | 14.651553 |
| C | 57.653316 | 61.488373 | 26.001488 |
| C | 56.341221 | 61.997730 | 14.381300 |
| C | 56.338924 | 61.988342 | 25.730995 |
| C | 55.885723 | 62.116413 | 13.030861 |
| C | 55.882942 | 62.106804 | 24.380594 |
| C | 54.492569 | 62.311600 | 12.761620 |
| C | 54.489658 | 62.301720 | 24.111912 |
| C | 54.022705 | 62.322182 | 11.411701 |
| C | 54.020363 | 62.314342 | 22.761812 |
| C | 61.334476 | 57.989807 | 21.943138 |
| C | 61.334038 | 57.989712 | 10.593310 |
| C | 60.556908 | 59.160908 | 21.673384 |
| C | 60.557339 | 59.161217 | 10.323304 |
| C | 60.254700 | 59.520126 | 20.323465 |
| C | 60.256607 | 59.519852 | 31.672684 |
| C | 59.235439 | 60.488316 | 20.055559 |
| C | 59.237728 | 60.488857 | 31.405109 |
| C | 58.862076 | 60.772751 | 18.705126 |
| C | 58.864223 | 60.771694 | 30.054216 |
| C | 57.651657 | 61.487999 | 18.434343 |
| C | 57.652397 | 61.484264 | 29.783812 |
| C | 57.225101 | 61.681530 | 17.084009 |
| C | 57.224213 | 61.674938 | 28.433798 |
| C | 55.885902 | 62.110992 | 16.814199 |
| C | 55.884102 | 62.102207 | 28.163858 |
| C | 55.425655 | 62.204720 | 15.463915 |
| C | 55.423389 | 62.194557 | 26.813662 |
| C | 54.024029 | 62.322910 | 15.194631 |
| C | 54.022099 | 62.314072 | 26.544861 |
| C | 53.553555 | 62.309925 | 13.843678 |
| C | 53.551250 | 62.303032 | 25.194117 |
| C | 52.161671 | 62.111984 | 13.573170 |
| C | 52.158279 | 62.110474 | 24.923182 |
| C | 51.705830 | 61.995903 | 12.222524 |
| C | 51.702576 | 61.995277 | 23.572145 |
| C | 50.391594 | 61.495838 | 11.951591 |
| C | 50.387196 | 61.498760 | 23.301548 |
| C | 58.861309 | 60.771393 | 22.487644 |
| C | 58.862087 | 60.773121 | 11.137592 |

|   |           |           |           |
|---|-----------|-----------|-----------|
| C | 58.470551 | 61.031631 | 21.137896 |
| C | 58.472187 | 61.032959 | 32.487461 |
| C | 57.221855 | 61.677086 | 20.866480 |
| C | 57.223438 | 61.678154 | 32.216362 |
| C | 56.783638 | 61.846523 | 19.515745 |
| C | 56.784512 | 61.844128 | 30.864996 |
| C | 55.422211 | 62.197117 | 19.247101 |
| C | 55.422863 | 62.193436 | 30.596500 |
| C | 54.959118 | 62.266102 | 17.896273 |
| C | 54.958431 | 62.259335 | 29.246214 |
| C | 53.554043 | 62.306732 | 17.626329 |
| C | 53.553169 | 62.300850 | 28.976727 |
| C | 53.085976 | 62.268970 | 16.276093 |
| C | 53.084755 | 62.262398 | 27.626711 |
| C | 51.707108 | 61.995262 | 16.004223 |
| C | 51.705036 | 61.992664 | 27.354803 |
| C | 51.259434 | 61.853302 | 14.654261 |
| C | 51.256065 | 61.852734 | 26.004427 |
| C | 49.975246 | 61.280731 | 14.383214 |
| C | 49.971031 | 61.281914 | 25.733885 |
| C | 49.569397 | 61.043774 | 13.032804 |
| C | 49.564335 | 61.046837 | 24.383146 |
| C | 48.444473 | 60.200756 | 12.761387 |
| C | 48.440208 | 60.202179 | 24.112026 |
| C | 48.101822 | 59.876949 | 11.411092 |
| C | 48.098934 | 59.879021 | 22.761198 |
| C | 56.336639 | 61.989799 | 21.948006 |
| C | 56.338608 | 61.993141 | 10.598049 |
| C | 54.957085 | 62.261993 | 21.679260 |
| C | 54.959385 | 62.266384 | 10.328983 |
| C | 54.488972 | 62.300797 | 20.329266 |
| C | 54.490170 | 62.301243 | 31.678850 |
| C | 53.084286 | 62.262676 | 20.059069 |
| C | 53.085178 | 62.262039 | 31.409252 |
| C | 52.620579 | 62.199734 | 18.708176 |
| C | 52.620201 | 62.196293 | 30.058577 |
| C | 51.259937 | 61.849686 | 18.436333 |
| C | 51.259319 | 61.847244 | 29.786692 |
| C | 50.821289 | 61.683796 | 17.085726 |
| C | 50.819386 | 61.681633 | 28.436260 |
| C | 49.571835 | 61.039749 | 16.815252 |
| C | 49.569408 | 61.038738 | 28.165953 |
| C | 49.180424 | 60.780300 | 15.464468 |
| C | 49.177147 | 60.780235 | 26.815001 |
| C | 48.104206 | 59.876637 | 15.193313 |
| C | 48.100559 | 59.876408 | 26.543949 |
| C | 47.781578 | 59.536781 | 13.842713 |
| C | 47.777390 | 59.537102 | 25.192942 |
| C | 46.938652 | 58.411934 | 13.571491 |
| C | 46.931789 | 58.414024 | 24.922161 |
| C | 46.700924 | 58.006126 | 12.221507 |
| C | 46.692474 | 58.009834 | 23.571754 |
| C | 46.130970 | 56.721436 | 11.952148 |
| C | 46.117596 | 56.726562 | 23.302200 |
| C | 52.618851 | 62.199318 | 22.491110 |
| C | 52.621464 | 62.202675 | 11.141446 |

|   |           |           |           |
|---|-----------|-----------|-----------|
| C | 52.158730 | 62.107460 | 21.141222 |
| C | 52.160248 | 62.107853 | 32.491589 |
| C | 50.819130 | 61.683834 | 20.868771 |
| C | 50.820740 | 61.682560 | 32.219723 |
| C | 50.392395 | 61.490849 | 19.518305 |
| C | 50.392532 | 61.489471 | 30.869265 |
| C | 49.180729 | 60.778606 | 19.247311 |
| C | 49.181038 | 60.776779 | 30.598045 |
| C | 48.805676 | 60.497299 | 17.897072 |
| C | 48.804508 | 60.495888 | 29.247799 |
| C | 47.782833 | 59.534252 | 17.625570 |
| C | 47.781349 | 59.532925 | 28.976166 |
| C | 47.479588 | 59.176659 | 16.275267 |
| C | 47.476837 | 59.175667 | 27.625933 |
| C | 46.699657 | 58.007156 | 16.004343 |
| C | 46.696133 | 58.006512 | 27.354803 |
| C | 46.485825 | 57.590218 | 14.653967 |
| C | 46.478786 | 57.591621 | 26.004538 |
| C | 45.987186 | 56.275856 | 14.383879 |
| C | 45.978722 | 56.277519 | 25.734066 |
| C | 45.873169 | 55.819824 | 13.033568 |
| C | 45.861134 | 55.823082 | 24.383612 |
| C | 45.679646 | 54.428318 | 12.760303 |
| C | 45.670597 | 54.430302 | 24.110844 |
| C | 45.668427 | 53.957592 | 11.409927 |
| C | 45.661137 | 53.960049 | 22.760073 |
| C | 49.970135 | 61.282650 | 21.950785 |
| C | 49.973473 | 61.279392 | 10.601585 |
| C | 48.800282 | 60.502975 | 21.679869 |
| C | 48.803421 | 60.500092 | 10.330173 |
| C | 48.443855 | 60.198059 | 20.328985 |
| C | 48.445702 | 60.195183 | 31.679367 |
| C | 47.478401 | 59.176678 | 20.057659 |
| C | 47.479446 | 59.174419 | 31.407921 |
| C | 47.197346 | 58.800114 | 18.707157 |
| C | 47.196430 | 58.798462 | 30.057596 |
| C | 46.483006 | 57.590012 | 18.437347 |
| C | 46.481544 | 57.588924 | 29.787487 |
| C | 46.292461 | 57.161167 | 17.086231 |
| C | 46.289703 | 57.159893 | 28.436459 |
| C | 45.867882 | 55.821545 | 16.815815 |
| C | 45.864803 | 55.820374 | 28.165674 |
| C | 45.777569 | 55.360241 | 15.464890 |
| C | 45.772942 | 55.360279 | 26.814459 |
| C | 45.663914 | 53.959534 | 15.191797 |
| C | 45.661564 | 53.959656 | 26.541553 |
| C | 45.679535 | 53.489273 | 13.841054 |
| C | 45.676331 | 53.490459 | 25.191008 |
| C | 45.879505 | 52.097565 | 13.568926 |
| C | 45.880985 | 52.099133 | 24.918833 |
| C | 45.999157 | 51.642021 | 12.218383 |
| C | 45.999043 | 51.643852 | 23.568077 |
| C | 46.503338 | 50.329247 | 11.946388 |
| C | 46.504757 | 50.331505 | 23.295967 |
| C | 47.193691 | 58.803116 | 22.489767 |
| C | 47.197460 | 58.800568 | 11.139450 |

|   |           |           |           |
|---|-----------|-----------|-----------|
| C | 46.934547 | 58.411720 | 21.139160 |
| C | 46.936634 | 58.409531 | 32.489174 |
| C | 46.289513 | 57.162781 | 20.869242 |
| C | 46.292610 | 57.159931 | 32.219536 |
| C | 46.122875 | 56.723824 | 19.519331 |
| C | 46.123177 | 56.721722 | 30.869528 |
| C | 45.775837 | 55.362068 | 19.247572 |
| C | 45.774361 | 55.360157 | 30.597507 |
| C | 45.713783 | 54.896660 | 17.897184 |
| C | 45.710850 | 54.894806 | 29.246965 |
| C | 45.681698 | 53.491631 | 17.623772 |
| C | 45.678921 | 53.489777 | 28.973522 |
| C | 45.721764 | 53.023182 | 16.272943 |
| C | 45.721416 | 53.022575 | 27.622595 |
| C | 46.003548 | 51.645584 | 16.000605 |
| C | 46.005306 | 51.645729 | 27.350241 |
| C | 46.144222 | 51.196499 | 14.649596 |
| C | 46.147430 | 51.198093 | 25.999077 |
| C | 46.722572 | 49.913898 | 14.378749 |
| C | 46.723610 | 49.914936 | 25.727816 |
| C | 46.959011 | 49.507999 | 13.028146 |
| C | 46.960526 | 49.509514 | 24.377085 |
| C | 47.802929 | 48.382950 | 12.755360 |
| C | 47.803474 | 48.383778 | 24.104322 |
| C | 48.124619 | 48.038811 | 11.404473 |
| C | 48.125488 | 48.040169 | 22.753927 |
| C | 45.978226 | 56.277775 | 21.951162 |
| C | 45.987526 | 56.273869 | 10.601807 |
| C | 45.710926 | 54.897610 | 21.679462 |
| C | 45.717094 | 54.895042 | 10.329513 |
| C | 45.676388 | 54.429550 | 20.328510 |
| C | 45.676571 | 54.427547 | 31.678596 |
| C | 45.725746 | 53.024902 | 20.055708 |
| C | 45.723747 | 53.022949 | 31.405489 |
| C | 45.795509 | 52.560486 | 18.704834 |
| C | 45.791603 | 52.558048 | 30.054501 |
| C | 46.154564 | 51.201706 | 18.431826 |
| C | 46.151676 | 51.199505 | 29.781790 |
| C | 46.323162 | 50.762966 | 17.081543 |
| C | 46.322823 | 50.762131 | 28.431065 |
| C | 46.968899 | 49.514790 | 16.811399 |
| C | 46.967628 | 49.513359 | 28.160162 |
| C | 47.226852 | 49.122227 | 15.459999 |
| C | 47.225830 | 49.121368 | 26.808971 |
| C | 48.127972 | 48.044319 | 15.186522 |
| C | 48.126518 | 48.043018 | 26.534994 |
| C | 48.466125 | 47.717358 | 13.835735 |
| C | 48.465702 | 47.717327 | 25.184370 |
| C | 49.583637 | 46.864319 | 13.563049 |
| C | 49.584042 | 46.865379 | 24.911997 |
| C | 49.985935 | 46.622524 | 12.211781 |
| C | 49.987144 | 46.624222 | 23.561077 |
| C | 51.268215 | 46.045128 | 11.940022 |
| C | 51.269485 | 46.047421 | 23.289454 |
| C | 45.787907 | 52.559116 | 22.487394 |
| C | 45.791351 | 52.557106 | 11.137294 |

|   |           |           |           |
|---|-----------|-----------|-----------|
| C | 45.886600 | 52.099140 | 21.136301 |
| C | 45.886124 | 52.097446 | 32.486259 |
| C | 46.321495 | 50.761982 | 20.864107 |
| C | 46.318829 | 50.759731 | 32.214066 |
| C | 46.516529 | 50.335842 | 19.513296 |
| C | 46.512848 | 50.333027 | 30.862936 |
| C | 47.229275 | 49.124466 | 19.242720 |
| C | 47.227486 | 49.122662 | 30.592087 |
| C | 47.510696 | 48.748745 | 17.892660 |
| C | 47.509163 | 48.747303 | 29.241825 |
| C | 48.470959 | 47.722786 | 17.618504 |
| C | 48.469048 | 47.721035 | 28.967667 |
| C | 48.824650 | 47.415943 | 16.267282 |
| C | 48.822781 | 47.414772 | 27.616230 |
| C | 49.987900 | 46.627365 | 15.995568 |
| C | 49.987373 | 46.628117 | 27.344650 |
| C | 50.403954 | 46.408127 | 14.645271 |
| C | 50.404606 | 46.410320 | 25.994282 |
| C | 51.716522 | 45.904606 | 14.371972 |
| C | 51.717815 | 45.908024 | 25.721163 |
| C | 52.169712 | 45.786232 | 13.020922 |
| C | 52.170910 | 45.788452 | 24.370316 |
| C | 53.561096 | 45.587753 | 12.747543 |
| C | 53.562096 | 45.587982 | 24.097273 |
| C | 54.032146 | 45.573845 | 11.396634 |
| C | 54.033531 | 45.570038 | 22.746670 |
| C | 46.724514 | 49.914074 | 21.945393 |
| C | 46.722847 | 49.912498 | 10.595659 |
| C | 47.504284 | 48.744183 | 21.674129 |
| C | 47.502949 | 48.742741 | 10.324195 |
| C | 47.807571 | 48.386135 | 20.323208 |
| C | 47.806316 | 48.384583 | 31.672806 |
| C | 48.824955 | 47.416500 | 20.049671 |
| C | 48.823273 | 47.414509 | 31.399073 |
| C | 49.201477 | 47.133541 | 18.699678 |
| C | 49.199329 | 47.131523 | 30.048658 |
| C | 50.407829 | 46.412273 | 18.428513 |
| C | 50.406303 | 46.411690 | 29.777626 |
| C | 50.833942 | 46.219372 | 17.076738 |
| C | 50.833645 | 46.221149 | 28.426016 |
| C | 52.171360 | 45.788628 | 16.803114 |
| C | 52.171913 | 45.793396 | 28.152782 |
| C | 52.632027 | 45.695454 | 15.452538 |
| C | 52.632912 | 45.701084 | 26.802050 |
| C | 54.032013 | 45.575951 | 15.178844 |
| C | 54.032810 | 45.581284 | 26.528687 |
| C | 54.500172 | 45.588318 | 13.827138 |
| C | 54.501049 | 45.590031 | 25.177094 |
| C | 55.892342 | 45.780025 | 13.552832 |
| C | 55.893654 | 45.778946 | 24.902973 |
| C | 56.348194 | 45.897129 | 12.201720 |
| C | 56.350128 | 45.892685 | 23.551701 |
| C | 57.663445 | 46.393890 | 11.930061 |
| C | 57.665291 | 46.391464 | 23.279831 |
| C | 49.196014 | 47.128326 | 22.480423 |
| C | 49.194515 | 47.126198 | 11.130836 |

|   |           |           |           |
|---|-----------|-----------|-----------|
| C | 49.587223 | 46.867275 | 21.129763 |
| C | 49.585197 | 46.864845 | 32.479774 |
| C | 50.834377 | 46.217346 | 20.858999 |
| C | 50.832352 | 46.215561 | 32.208752 |
| C | 51.273235 | 46.047688 | 19.508917 |
| C | 51.271412 | 46.048080 | 30.858263 |
| C | 52.632645 | 45.690422 | 19.234940 |
| C | 52.631855 | 45.695114 | 30.584681 |
| C | 53.096645 | 45.626984 | 17.882986 |
| C | 53.096828 | 45.632763 | 29.232944 |
| C | 54.501072 | 45.584976 | 17.608889 |
| C | 54.500866 | 45.591454 | 28.958826 |
| C | 54.969620 | 45.625153 | 16.258579 |
| C | 54.969929 | 45.630161 | 27.608482 |
| C | 56.348831 | 45.894470 | 15.984895 |
| C | 56.349243 | 45.897579 | 27.334749 |
| C | 56.795437 | 46.036892 | 14.633682 |
| C | 56.796299 | 46.037621 | 25.983648 |
| C | 58.079575 | 46.607925 | 14.362206 |
| C | 58.080742 | 46.608044 | 25.711819 |
| C | 58.485214 | 46.846325 | 13.011309 |
| C | 58.486347 | 46.845490 | 24.361210 |
| C | 59.609608 | 47.689167 | 12.738921 |
| C | 59.610844 | 47.688797 | 24.088394 |
| C | 59.952278 | 48.011051 | 11.388498 |
| C | 59.953678 | 48.010155 | 22.737850 |
| C | 51.719292 | 45.902378 | 21.938984 |
| C | 51.717651 | 45.902302 | 10.589239 |
| C | 53.096653 | 45.622734 | 21.665485 |
| C | 53.095718 | 45.626270 | 10.315742 |
| C | 53.565006 | 45.580742 | 20.315027 |
| C | 53.563812 | 45.586239 | 31.665173 |
| C | 54.970016 | 45.617207 | 20.040295 |
| C | 54.968594 | 45.624542 | 31.390532 |
| C | 55.434662 | 45.684326 | 18.688862 |
| C | 55.433735 | 45.691463 | 30.039206 |
| C | 56.796459 | 46.033539 | 18.416788 |
| C | 56.796402 | 46.037079 | 29.766718 |
| C | 57.236275 | 46.199947 | 17.066370 |
| C | 57.236874 | 46.201965 | 28.416086 |
| C | 58.486588 | 46.842667 | 16.794859 |
| C | 58.488041 | 46.843147 | 28.144596 |
| C | 58.876179 | 47.102779 | 15.443459 |
| C | 58.877266 | 47.103561 | 26.793167 |
| C | 59.950474 | 48.009689 | 15.171575 |
| C | 59.951530 | 48.010525 | 26.520794 |
| C | 60.271858 | 48.353321 | 13.820949 |
| C | 60.272995 | 48.353706 | 25.170212 |
| C | 61.110855 | 49.481400 | 13.548581 |
| C | 61.115032 | 49.479782 | 24.897953 |
| C | 61.347523 | 49.887264 | 12.198052 |
| C | 61.354622 | 49.884094 | 23.547237 |
| C | 61.912739 | 51.175381 | 11.929392 |
| C | 61.920818 | 51.172871 | 23.278267 |
| C | 55.434895 | 45.682980 | 22.471226 |
| C | 55.432949 | 45.690071 | 11.121099 |

|   |           |           |           |
|---|-----------|-----------|-----------|
| C | 55.896545 | 45.770821 | 21.120283 |
| C | 55.894897 | 45.778000 | 32.470337 |
| C | 57.237263 | 46.196228 | 20.848438 |
| C | 57.236282 | 46.200481 | 32.198296 |
| C | 57.666164 | 46.388935 | 19.497583 |
| C | 57.666649 | 46.391125 | 30.847620 |
| C | 58.878086 | 47.101448 | 19.225405 |
| C | 58.879597 | 47.101379 | 30.575218 |
| C | 59.253258 | 47.385674 | 17.875181 |
| C | 59.255199 | 47.385113 | 29.225151 |
| C | 60.272251 | 48.353580 | 17.603188 |
| C | 60.273235 | 48.353939 | 28.952576 |
| C | 60.572941 | 48.714046 | 16.252102 |
| C | 60.573612 | 48.714581 | 27.601465 |
| C | 61.345360 | 49.888309 | 15.980564 |
| C | 61.347073 | 49.888058 | 27.330038 |
| C | 61.558037 | 50.306862 | 14.630457 |
| C | 61.561634 | 50.305782 | 25.979637 |
| C | 62.050465 | 51.623276 | 14.361833 |
| C | 62.056541 | 51.621658 | 25.710640 |
| C | 62.167164 | 52.078136 | 13.012200 |
| C | 62.175297 | 52.076557 | 24.360867 |
| C | 62.360325 | 53.471104 | 12.745535 |
| C | 62.367718 | 53.470524 | 24.094357 |
| C | 58.083355 | 46.604858 | 21.929001 |
| C | 58.082336 | 46.607407 | 10.579604 |
| C | 59.253250 | 47.385223 | 21.656889 |
| C | 59.253063 | 47.385639 | 10.307437 |
| C | 59.612419 | 47.687412 | 20.305647 |
| C | 59.612728 | 47.688057 | 31.656141 |
| C | 60.574623 | 48.712551 | 20.034124 |
| C | 60.574131 | 48.713623 | 31.384506 |
| C | 60.854347 | 49.089813 | 18.683680 |
| C | 60.854774 | 49.090416 | 30.033880 |
| C | 61.559750 | 50.306210 | 18.413345 |
| C | 61.560417 | 50.306526 | 29.763670 |
| C | 61.746750 | 50.736370 | 17.063070 |
| C | 61.748741 | 50.736382 | 28.412355 |
| C | 62.164448 | 52.079021 | 16.794458 |
| C | 62.168575 | 52.078079 | 28.144127 |
| C | 62.254932 | 52.539680 | 15.444564 |
| C | 62.260437 | 52.538181 | 26.793489 |
| C | 60.858608 | 49.086483 | 22.465324 |
| C | 60.855301 | 49.088299 | 11.116212 |
| C | 61.115936 | 49.479774 | 21.115051 |
| C | 61.112988 | 49.481770 | 32.465721 |
| C | 61.752129 | 50.734566 | 20.844841 |
| C | 61.749142 | 50.736061 | 32.195698 |
| C | 61.913620 | 51.176712 | 19.495369 |
| C | 61.913349 | 51.177036 | 30.846069 |
| C | 62.257263 | 52.539768 | 19.226910 |
| C | 62.259064 | 52.539627 | 30.577208 |
| C | 62.320076 | 53.005089 | 17.877439 |
| C | 62.323349 | 53.004204 | 29.227446 |
| C | 62.057743 | 51.621666 | 21.927927 |
| C | 62.052402 | 51.623249 | 10.579192 |



|   |           |           |           |
|---|-----------|-----------|-----------|
| C | 62.325871 | 53.002979 | 21.660547 |
| C | 62.321899 | 53.003746 | 10.311664 |
| C | 62.362274 | 53.471695 | 20.310925 |
| C | 62.362545 | 53.471493 | 31.661844 |
| C | 54.053913 | 56.713020 | 24.077091 |
| C | 54.062443 | 57.552322 | 25.209049 |
| C | 54.090111 | 57.008266 | 26.488678 |
| C | 54.098145 | 55.596729 | 26.623867 |
| C | 54.081020 | 54.824726 | 25.428410 |
| C | 53.014408 | 55.468330 | 20.244530 |
| C | 53.456722 | 56.308456 | 19.209627 |
| C | 54.760143 | 56.652534 | 19.571022 |
| C | 56.843052 | 52.908875 | 23.104336 |
| C | 54.077755 | 51.407406 | 24.297337 |
| C | 54.129982 | 50.662109 | 25.492598 |
| C | 54.132725 | 51.310223 | 26.723639 |
| C | 54.105888 | 52.728535 | 26.742527 |
| C | 54.067604 | 53.400974 | 25.488337 |
| C | 54.783581 | 52.278477 | 20.337193 |
| C | 54.267895 | 51.319950 | 19.450312 |
| C | 53.002998 | 51.018909 | 19.957048 |
| C | 51.195839 | 55.156887 | 23.185970 |
| C | 58.187824 | 53.205818 | 22.836164 |
| C | 58.147156 | 54.441193 | 22.188648 |
| C | 54.118523 | 54.899986 | 27.883968 |
| C | 49.835457 | 54.855812 | 23.024128 |
| C | 49.826794 | 53.555847 | 22.517811 |
| C | 54.127747 | 53.527191 | 27.940338 |
| B | 56.378448 | 56.241192 | 21.571484 |
| B | 51.542789 | 51.671375 | 22.013071 |
| H | 56.206818 | 56.994297 | 22.516039 |
| H | 57.230637 | 56.674976 | 20.820251 |
| H | 51.789467 | 51.034618 | 23.023985 |
| H | 50.636730 | 51.158981 | 21.385176 |
| H | 54.027210 | 57.131947 | 23.075487 |
| H | 54.049290 | 58.631691 | 25.057627 |
| H | 54.100048 | 57.645870 | 27.374479 |
| H | 52.068512 | 54.950718 | 20.346426 |
| H | 52.913425 | 56.607372 | 18.319632 |
| H | 55.497837 | 57.277390 | 19.078613 |
| H | 56.431915 | 52.022575 | 23.568840 |
| H | 54.074989 | 50.907734 | 23.332933 |
| H | 54.155785 | 49.574062 | 25.428108 |
| H | 54.161011 | 50.748669 | 27.659058 |
| H | 55.728134 | 52.807655 | 20.298601 |
| H | 54.740818 | 50.916672 | 18.561293 |
| H | 52.234966 | 50.338432 | 19.604584 |
| H | 51.642727 | 56.083061 | 23.522900 |
| H | 59.057060 | 52.602383 | 23.069950 |
| H | 58.938042 | 55.068687 | 21.793224 |
| H | 54.134708 | 55.488827 | 28.803663 |
| H | 48.988495 | 55.497444 | 23.234890 |
| H | 49.008743 | 52.902245 | 22.239773 |
| H | 54.154133 | 53.016418 | 28.905279 |
| N | 54.071461 | 55.366028 | 24.161777 |
| N | 53.981445 | 55.322983 | 21.186144 |

|    |           |           |           |
|----|-----------|-----------|-----------|
| N  | 56.034401 | 53.903931 | 22.659107 |
| N  | 55.060982 | 56.055397 | 20.754272 |
| N  | 56.854443 | 54.844585 | 22.091530 |
| N  | 54.035618 | 52.756313 | 24.272095 |
| N  | 53.895470 | 52.533398 | 21.330940 |
| N  | 51.967567 | 54.105892 | 22.809517 |
| N  | 52.792606 | 51.753242 | 21.080418 |
| N  | 51.107307 | 53.122200 | 22.397181 |
| Fe | 53.999687 | 53.998497 | 22.732849 |
